# Supplementary material
Source: PubMed Central journal article supplement (PMC2759758)
Supplement: NIHMS141616-supplement-Footnotes.pdf [file NIHMS141616-supplement-Footnotes.pdf]

<sup>1</sup> See [Appendix A.2](#) for a description of the space of global properties.

<sup>2</sup> The image database may be viewed on the authors' web site.

<sup>3</sup> [Appendix A.4](#) describes a speeded classification task, to verify that the global properties of natural images are perceived under conditions of limited presentation time. The logic, as suggested by an anonymous reviewer, is that under limited presentation time, the perception of global properties might be less contaminated by other semantic information about the scene category. Although category information cannot be completely abolished in a short presentation time, other data in a forthcoming article by the authors show that the detection of global properties in a scene is significantly better than the detection of the same scene's basic-level category at a 20 ms presentation time (see also [Joubert, Rousselet, Fize, & Fabre-Thorpe, 2007](#) showing that the global property of naturalness is available faster than a scene's basic-level category), indicating that some category information was suppressed in the manipulation.
